# Supplementary material
Source: publisher site journal article supplement (https://www.dovepress.com/article/484969)
Supplement: Supplementary file 1 [file get_supplementary_file.php]

ORIGINAL RESEARCH

Liying Lu et al

**Protopine exerts** **neuroprotective effects on neonatal hypoxic-ischemic brain damage in rats via activation of the AMPK/PGC1α pathway**

Liying Lu1,2, Mengdan Pang1,2, Tingting Chen1,2, Yingying Hu1,2, Likai Chen4, Xiaoyue Tao1,2, Shangqin Chen1,2, Jianghu Zhu1,2, Fang Mingchu1,2, XiaoLing Guo1,3*, Zhenlang Lin1,2,3*

1Department of Pediatrics, The Second School of Medicine, The Second Affiliated Hospital and Yuying Children’s Hospital of Wenzhou Medical University, Wenzhou, Zhejiang, China; 2Key Laboratory of Perinatal Medicine of Wenzhou, the Second Affiliated Hospital and Yuying Children’s Hospital of Wenzhou Medical University, Wenzhou, Zhejiang, China; 3Basic Medical Research Center, the Second Affiliated Hospital and Yuying Children’s Hospital of Wenzhou Medical University, Wenzhou, Zhejiang, China; 4Elson S. Floyd College of Medicine at Washington State University, Spokane, WA USA

***Correspondence:** Xiaoling Guo, PhD, and Zhenlang Lin, MD

The Second Affiliated Hospital and Yuying Children's Hospital of Wenzhou Medical University, 109 Xueyuan West Road, Wenzhou 325027, Zhejiang, China.

E-mail address: guoxling@hotmail.com (XL Guo); [linzhenlang@hotmail.com (Z](mailto:linzhenlang@hotmail.com%20(Z)L Lin).

Tel: 00-86-138-0668-9800

Fax: 86-0577-88002198

**Supplement Figure**


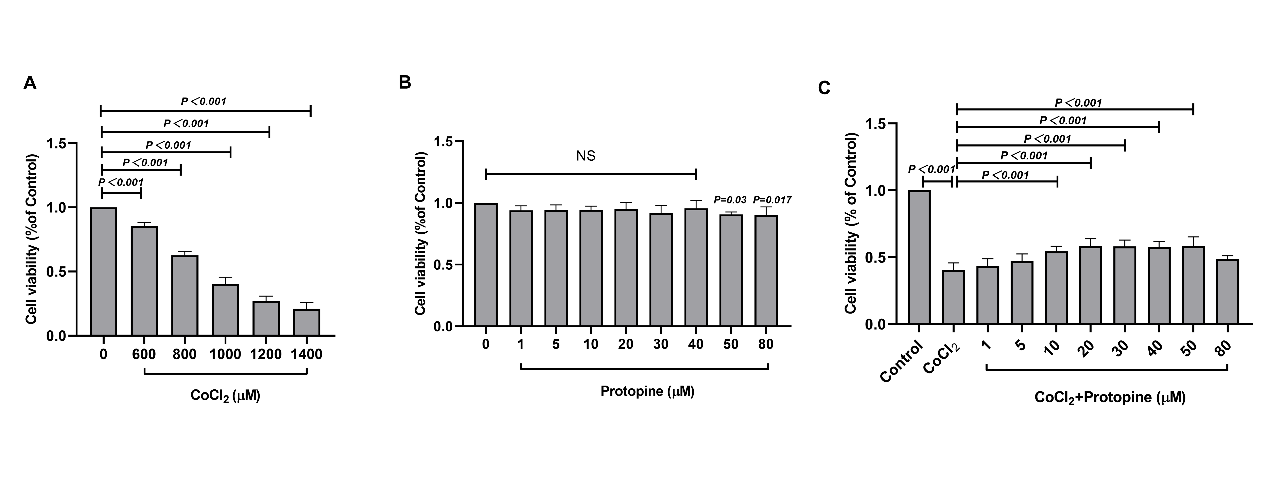


**Figure S1:** **Exploration of the ideal working concentration of Pro for PC12 cells.** (A) The cell viability of PC12 cells treated with different doses of CoCl2 for 24 h was detect by CCK-8 assay (n = 6). (B) The safe dose ranges of Pro were determined by CCK-8 assay (n = 6). (C) Effect of different doses of Pro on the viability of PC12 cells after CoCl2 injury (n = 6). The data are presented as mean ± SD. NS indicate no significance.

**Supplement Table:**

| **Antibody** | **Species** | **Company (catalogue)** | **Dilution** | |
| --- | --- | --- | --- | --- |
| **WB** | **IHC/IF** |
| AMPK | Rabbit | Cell Signaling Technology (Danvers, MA, 5831) | 1:1000 | ND |
| p- AMPK | Rabbit | Cell Signaling Technology (Danvers, MA, 2535) | 1:1000 | ND |
| PGC1α | Mouse | Proteintech (Wuhan, China, 66369-1-Ig) | 1:1000 | ND |
| NRF1 | Rabbit | Proteintech (Wuhan, China, 12482-1-AP) | 1:1000 | 1:200 |
| TFAM | Rabbit | Proteintech (Wuhan, China, 22586-1-AP) | 1:1000 | 1:200 |
| BAX | Rabbit | Affinity (Cincinnati, USA, AF0120) | 1:1000 | ND |
| BCL-2 | Rabbit | Affinity (Cincinnati, USA, AF6139) | 1:1000 | ND |
| MAP-2 | Rabbit | Abcam (Cambridge, UK, ab254264) | 1:1000 | ND |
| MBP | Rabbit | Abcam (Cambridge, UK, ab218011) | 1:1000 | ND |
| IBA-1 | Mouse | Abcam (Cambridge, UK, ab178846) | ND | 1:200 |
| β-Actin | Rabbit | Affinity (Cincinnati, USA, T0022) | 1:1000 | ND |
| HRP-Goat Anti-Mouse IgG |  | Proteintech (Wuhan, China, SA00001-1) | 1:5000 | ND |
| HRP-Goat Anti-Rabbit IgG |  | Proteintech (Wuhan, China, SA00001-2) | 1:5000 | ND |
| Cy3-conjugated Goat Anti-Rabbit |  | Proteintech (Wuhan, China, SA00009-2) | ND | 1:200 |
| Cy3-conjugated Goat Anti-Mouse |  | Proteintech (Wuhan, China, SA00009-1) | ND | 1:200 |
| FITC-conjugated Goat Anti-Mouse |  | Proteintech (Wuhan, China, SA00003-1) | ND | 1:200 |

**Table S1: Antibodies used in the experiments.** ND = Not detected; WB = Western blot; IHC: Immunohistochemistry; IF: Immunofluorescence.
